# TABLE OF CONTENTS

# ANESTHESIOLOGY

|                                                  |     |
|--------------------------------------------------|-----|
| ◇ This Month in ANESTHESIOLOGY .....             | 1A  |
| Science, Medicine, and the Anesthesiologist..... | 19A |
| Infographics in Anesthesiology .....             | 23A |

## ◆ Editorial Views

|                                                                                    |     |
|------------------------------------------------------------------------------------|-----|
| In Memoriam: Brian Kavanagh, 1962 to 2019<br><i>B. A. Orser, L. Brochard</i> ..... | 759 |
|------------------------------------------------------------------------------------|-----|

|                                                                                                                   |     |
|-------------------------------------------------------------------------------------------------------------------|-----|
| GAS, PANDA, and MASK: No Evidence of Clinical Anesthetic Neurotoxicity!<br><i>L. Vutskits, D. J. Culley</i> ..... | 762 |
|-------------------------------------------------------------------------------------------------------------------|-----|

|                                                                                                                                                                                                                               |     |
|-------------------------------------------------------------------------------------------------------------------------------------------------------------------------------------------------------------------------------|-----|
| Modification of the World Health Organization Global Guidelines for Prevention of Surgical Site Infection Is Needed<br><i>G. Hedenstierna, C. S. Meyhoff, G. Perchiazzi, A. Larsson, J. Wetterslev, L. S. Rasmussen</i> ..... | 765 |
|-------------------------------------------------------------------------------------------------------------------------------------------------------------------------------------------------------------------------------|-----|

|                                                                                  |     |
|----------------------------------------------------------------------------------|-----|
| Adding Science to the Decision to Extubate Children<br><i>D. J. Murray</i> ..... | 769 |
|----------------------------------------------------------------------------------|-----|

|                                                                                      |     |
|--------------------------------------------------------------------------------------|-----|
| Pre-emergence Oxygenation and Postoperative Atelectasis<br><i>K. B. Domino</i> ..... | 771 |
|--------------------------------------------------------------------------------------|-----|

|                                                                                          |     |
|------------------------------------------------------------------------------------------|-----|
| Current Difficult Airway Management—Not Good Enough!<br><i>T. Asai, D. Hillman</i> ..... | 774 |
|------------------------------------------------------------------------------------------|-----|

## Special Announcements

|                                                                                                                                                                                                                      |     |
|----------------------------------------------------------------------------------------------------------------------------------------------------------------------------------------------------------------------|-----|
| Journal-related Activities and Other Special Activities at the 2019 American Society of Anesthesiologists Meeting<br><i>M. J. Avram, D. J. Culley, A. A. Fox, E. D. Kharasch, M. J. London, J. P. Rathmell</i> ..... | 777 |
|----------------------------------------------------------------------------------------------------------------------------------------------------------------------------------------------------------------------|-----|

|                                                                                                               |     |
|---------------------------------------------------------------------------------------------------------------|-----|
| Judith Hellman, M.D., Recipient of the 2019 Excellence in Research Award<br><i>J. P. Wiener-Kronish</i> ..... | 788 |
|---------------------------------------------------------------------------------------------------------------|-----|

|                                                                                                                                                   |     |
|---------------------------------------------------------------------------------------------------------------------------------------------------|-----|
| Seun Johnson-Akeju, M.D., M.M.Sc., Recipient of the 2019 James E. Cottrell, M.D., Presidential Scholar Award<br><i>J. P. Wiener-Kronish</i> ..... | 792 |
|---------------------------------------------------------------------------------------------------------------------------------------------------|-----|

## Special Article

|                                                                                                                                                   |     |
|---------------------------------------------------------------------------------------------------------------------------------------------------|-----|
| Musings from an Unlikely Clinician–Scientist: 2018 American Society of Anesthesiologists Excellence in Research Award<br><i>B. A. Orser</i> ..... | 795 |
|---------------------------------------------------------------------------------------------------------------------------------------------------|-----|

In this article, the author shares several personal stories, with the goal of encouraging young investigators, and then describes pivotal studies that have identified the unique pharmacologic properties and physiologic roles of extrasynaptic  $\gamma$ -aminobutyric acid type A receptors.

## Perioperative Medicine

### CLINICAL SCIENCE

|                                                                                                                                                                                                                                                                                                                  |     |
|------------------------------------------------------------------------------------------------------------------------------------------------------------------------------------------------------------------------------------------------------------------------------------------------------------------|-----|
| ◆ ◆ Assessment of Common Criteria for Awake Extubation in Infants and Young Children<br><i>T. W. Templeton, E. J. Goenaga-Díaz, M. G. Downard, C. J. McLouth, T. E. Smith, L. B. Templeton, S. H. Pecorella, D. E. Hammon, J. J. O'Brien, D. H. McLaughlin, A. E. Lawrence, P. R. Tennant, D. G. Ririe</i> ..... | 801 |
|------------------------------------------------------------------------------------------------------------------------------------------------------------------------------------------------------------------------------------------------------------------------------------------------------------------|-----|

For an awake-extubation in a child that has had volatile anesthesia, facial grimace, purposeful movement, conjugate gaze, eye opening, and tidal volume greater than 5 ml/kg are all associated with successful extubation. The chances of successful extubation steadily increase as more of these features are present.

◇ Refers to This Month in ANESTHESIOLOGY  
◆ Refers to Editorial Views  
 This article has an Audio Podcast

 See Supplemental Digital Content  
 CME Article  
 This article has a Video Abstract

 Part of the Letheon writing competition  
 This article has a Visual Abstract  
 Readers' Toolbox

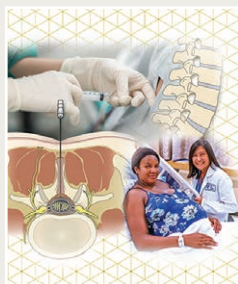

**ON THE COVER:** The use of epidural analgesia to manage labor pain is lower in Hispanic than Caucasian women in the United States. In this issue of ANESTHESIOLOGY, Togioka *et al.* evaluated the use of a linguistically concordant educational program that describes the epidural procedure and explains alternatives and found that it increased epidural analgesia use in women of Hispanic ethnicity. Cover illustration: S. Jarret, C.M.I. Cover photograph: J. P. Rathmell.

- Togioka *et al.*: Education Program Regarding Labor Epidurals Increases Utilization by Hispanic Medicaid Beneficiaries: A Randomized Controlled Trial, p. 840

# ◆ ◆ Positive End-expiratory Pressure and Postoperative Atelectasis:

## A Randomized Controlled Trial

 E. Östberg, A. Thorisson, M. Enlund, H. Zetterström,  
G. Hedenstierna, L. Edmark .....809

Thirty patients undergoing nonabdominal surgery under general anesthesia were randomized to maintained (7 or 9 cm H<sub>2</sub>O) or zero positive end-expiratory pressure before being given 100% oxygen for emergence preoxygenation. Postoperative atelectasis (assessed by computed tomography) was small with no effect on oxygenation, whether or not positive end-expiratory pressure was used during emergence.

# CME ◆ Management of Difficult Tracheal Intubation: A Closed Claims Analysis

A. M. Joffe, M. F. Aziz, K. L. Posner, L. V. Duggan,  
S. L. Mincer, K. B. Domino .....818

This article compared recent malpractice claims related to difficult tracheal intubation to historic claims using the Anesthesia Closed Claims Project database. Outcomes remained poor in recent malpractice claims related to difficult tracheal intubation. The number of claims during the induction phase of anesthesia in this report is comparable with the previous report of 1993 to 1999, but outcomes are poorer. Inadequate airway planning and judgment errors were contributors to patient harm. Almost three fourths exhibited judgment failures, which were more common in elective and urgent intubation procedures than emergency tracheal intubations. Delay in surgical airway initiation during “can’t intubate, can’t oxygenate” emergencies remains an issue in airway management.

# ◆ Hypoxemia, Bradycardia, and Multiple Laryngoscopy Attempts during Anesthetic Induction in Infants: A Single-center, Retrospective Study

 J. A. Gálvez, S. Acquah, L. Ahumada, L. Cai, M. Polanski, L. Wu,  
A. F. Simpao, J. M. Tan, J. Wasey, J. E. Fiadjoe .....830

In a quaternary pediatric academic center, 16% of healthy infants undergoing routine tracheal intubations had multiple laryngoscopies. There was also a 35% incidence of hypoxemia, defined as an oxygen saturation measurement less than 90%, during induction of anesthesia. There was evidence for an association between multiple laryngoscopies and hypoxemia. *SUPPLEMENTAL DIGITAL CONTENT IS AVAILABLE IN THE TEXT*

# ◆ Education Program Regarding Labor Epidurals Increases Utilization by Hispanic Medicaid Beneficiaries: A Randomized Controlled Trial

 B. M. Togioka, K. M. Seligman, M. K. Wernitz, N. D. Yanez,  
L. M. Noles, M. M. Treggiari .....840

A language-concordant, educational program regarding labor epidurals during the first stage of labor, in addition to the routine prenatal education, is feasible and does not cause any negative effect. Such an intervention increases epidural use among Hispanic but not non-Hispanic women. It also reduces misconceptions regarding epidural analgesia in both Hispanic and non-Hispanic women. *SUPPLEMENTAL DIGITAL CONTENT IS AVAILABLE IN THE TEXT*

## BASIC SCIENCE

### ◆ Propofol Anesthesia Alters Spatial and Topologic Organization of Rat Brain Metabolism

Y. Chen, W. Bao, X. Liang, J. Zhang .....850

The brains of rodents undergoing propofol anesthesia demonstrate reduced metabolic network connectivity and efficiency. These effects might inform the mechanism of the functional disconnections and network inefficiency observed during general anesthesia in humans. *SUPPLEMENTAL DIGITAL CONTENT IS AVAILABLE IN THE TEXT*

## Critical Care Medicine

### BASIC SCIENCE

### ◆ Recombinant Thrombomodulin on Neutrophil Extracellular Traps in Murine Intestinal Ischemia–Reperfusion

N. Hayase, K. Doi, T. Hiruma, R. Matsuura, Y. Hamasaki,  
E. Noiri, M. Nangaku, N. Morimura .....866

In male mice, recombinant thrombomodulin administration after intestinal ischemia–reperfusion increased survival rate. Histones and neutrophil extracellular traps were found in the livers and intestines after ischemia–reperfusion, and recombinant thrombomodulin reduced these accumulations only in the liver. Recombinant thrombomodulin may attenuate liver injury by suppressing hepatic histone and neutrophil extracellular trap accumulation. *SUPPLEMENTAL DIGITAL CONTENT IS AVAILABLE IN THE TEXT*

## Pain Medicine

### CLINICAL SCIENCE

### ◆ Outcomes of Sympathetic Blocks in the Management of Complex Regional Pain Syndrome: A Retrospective Cohort Study

 J. Cheng, V. Salmasi, J. You, M. Grille, D. Yang, E. J. Mascha,  
O. T. Cheng, F. Zhao, R. W. Rosenquist .....883

In patients with complex regional pain syndrome, skin temperature change is not associated with sympathetic block pain reduction. The short- and long-term effects of sympathetic blocks are not associated with spinal cord stimulation outcomes. *SUPPLEMENTAL DIGITAL CONTENT IS AVAILABLE IN THE TEXT*

## Education

### IMAGES IN ANESTHESIOLOGY

### ◆ Intraoperative Application of Lung Ultrasound to Diagnose Alveolar Consolidation

M. M. Hollon, B. Fiza, A. Faloye .....894

*SUPPLEMENTAL DIGITAL CONTENT IS AVAILABLE IN THE TEXT*

|                                                                                                            |     |
|------------------------------------------------------------------------------------------------------------|-----|
| <b>Emergency Airway Management with a Laryngeal Mask Airway in a Patient with Massive Cervical Lipomas</b> |     |
| <i>O. Azizad, C. Adkins, B. Mitchell</i>                                                                   | 895 |

|                                                 |     |
|-------------------------------------------------|-----|
| <b>Partial Atrioventricular Canal Defect</b>    |     |
| <i>R. J. Fernando, S. D. Johnson, T. Carter</i> | 896 |

## CLINICAL FOCUS REVIEW

|                                                                                                                                                                                                          |     |
|----------------------------------------------------------------------------------------------------------------------------------------------------------------------------------------------------------|-----|
|  <b>Inflammatory Basis of Pulmonary Arterial Hypertension: Implications for Perioperative and Critical Care Medicine</b> |     |
| <i>N. M. Goldenberg, M. Rabinovitch, B. E. Steinberg</i>                                                                                                                                                 | 898 |

Patients with pulmonary arterial hypertension have exceptionally high perioperative risk. This review summarizes the clinical presentation and therapies for pulmonary arterial hypertension, and it highlights evidence for inflammation as a driver of disease pathogenesis and a therapeutic target.

## REVIEW ARTICLE

|                                                                                                                                                                                                |     |
|------------------------------------------------------------------------------------------------------------------------------------------------------------------------------------------------|-----|
|  <b>Learners and Luddites in the Twenty-first Century: Bringing Evidence-based Education to Anesthesiology</b> |     |
| <i>S. M. Martinelli, R. S. Isaak, R. M. Schell, J. D. Mitchell, M. D. McEvoy, F. Chen</i>                                                                                                      | 908 |

This article reviews several new concepts in medical education and empirical evidence of their utilization for anesthesiology learners. Methodologies and theories for evidence-based educational practices are described.

## MIND TO MIND

|                                                                                                     |     |
|-----------------------------------------------------------------------------------------------------|-----|
|  <b>12th Trip</b> |     |
| <i>E. B. Baker</i>                                                                                  | 929 |

|                                                   |     |
|---------------------------------------------------|-----|
| <b>My Personal Tryst with Ketamine Anesthesia</b> |     |
| <i>S. Agarwal</i>                                 | 930 |

## Correspondence

|                                                                                                                                                            |     |
|------------------------------------------------------------------------------------------------------------------------------------------------------------|-----|
| <b>Supplemental Oxygen and the Risk of Surgical Site Infection: Evidence of Compromised Data Requires Correction of Previously Published Meta-analysis</b> |     |
| <i>F. Hovaguimian, N. Elia, M. R. Tramèr</i>                                                                                                               | 932 |

|                                                                 |     |
|-----------------------------------------------------------------|-----|
| <b>Succinylcholine Use and Dantrolene Availability: Comment</b> |     |
| <i>G. P. Joshi, M. Desai, A. Valedon, S. Gayer</i>              | 934 |

|                                                                                                                                                                         |     |
|-------------------------------------------------------------------------------------------------------------------------------------------------------------------------|-----|
| <b>Succinylcholine Use and Dantrolene Availability: Reply</b>                                                                                                           |     |
| <i>M. G. Larach, T. T. Klumpner, B. W. Brandom, M. T. Vaughn, K. G. Belani, A. Herlich, T. W. Kim, J. Limoncelli, S. Riazi, E. L. Sivak, J. Capacchione, D. Mashman</i> | 935 |

|                                                                      |     |
|----------------------------------------------------------------------|-----|
| <b>Opioid-induced Ventilatory Depression in Sleep Apnea: Comment</b> |     |
| <i>F. J. Overdyk, A. Dahan, F. Chung, M. A. Warner</i>               | 936 |

|                                                                    |     |
|--------------------------------------------------------------------|-----|
| <b>Opioid-induced Ventilatory Depression in Sleep Apnea: Reply</b> |     |
| <i>A. G. Doufas, S. L. Shafer, T. K. Henthorn</i>                  | 937 |

|                                                                 |     |
|-----------------------------------------------------------------|-----|
| <b>Chlorhexidine Inefficacy in Ventilated Patients: Comment</b> |     |
| <i>P. M. Kempen</i>                                             | 938 |

|                                                               |     |
|---------------------------------------------------------------|-----|
| <b>Chlorhexidine Inefficacy in Ventilated Patients: Reply</b> |     |
| <i>B. La Combe, J.-D. Ricard</i>                              | 939 |

|                                                                |     |
|----------------------------------------------------------------|-----|
| <b>Cardiac Events after Electroconvulsive Therapy: Comment</b> |     |
| <i>S. D. Østergaard, C. H. Kellner</i>                         | 940 |

|                                                              |     |
|--------------------------------------------------------------|-----|
| <b>Cardiac Events after Electroconvulsive Therapy: Reply</b> |     |
| <i>A. Duma, P. Nagele</i>                                    | 942 |

|                                                            |     |
|------------------------------------------------------------|-----|
| <b>Delays Decrease Survival in Cardiac Arrest: Comment</b> |     |
| <i>J. A. Stewart</i>                                       | 942 |

|                                                          |     |
|----------------------------------------------------------|-----|
| <b>Delays Decrease Survival in Cardiac Arrest: Reply</b> |     |
| <i>N. G. Bircher, P. S. Chan, Y. Xu</i>                  | 944 |

|                                                              |     |
|--------------------------------------------------------------|-----|
| <b>Neurologic Examination for Anesthesiologists: Comment</b> |     |
| <i>G. B. Drummond</i>                                        | 945 |

|                                                            |     |
|------------------------------------------------------------|-----|
| <b>Neurologic Examination for Anesthesiologists: Reply</b> |     |
| <i>E. N. Brown</i>                                         | 946 |

|                                      |     |
|--------------------------------------|-----|
| <b>Operating Room Fires: Comment</b> |     |
| <i>J. Ehrenwerth</i>                 | 946 |

|                                    |     |
|------------------------------------|-----|
| <b>Operating Room Fires: Reply</b> |     |
| <i>T. S. Jones, E. L. Jones</i>    | 947 |

|                |     |
|----------------|-----|
| <b>Erratum</b> | 948 |
|----------------|-----|

## Anesthesiology Reflections from The Wood Library-Museum

|                                                                                                            |     |
|------------------------------------------------------------------------------------------------------------|-----|
| <b>May Day of 1961 and Self-appendectomy with Novocaine in Antarctica: Leonid Rogozov's 0.5% Solution?</b> |     |
| <i>George S. Bause</i>                                                                                     | 768 |

|                                                                                       |     |
|---------------------------------------------------------------------------------------|-----|
| <b>The Providential Discharge of Civil War Dentist-Anaesthetist Moses S. Eldridge</b> |     |
| <i>George S. Bause</i>                                                                | 773 |

**From Piles of Fortune to Piles of Wood: Bangor's  
William E. Mann and "Ko-Kane"**

*George S. Bause* ..... 817

**Coupling Hoses then Coupling Pierrots with Pirouettes:  
William B. Kilbourne Peddles "Pain Stop" from Auburn, Maine**

*George S. Bause* ..... 893

**Careers & Events ..... 25A**

**INSTRUCTIONS FOR AUTHORS**

The most recently updated version of the Instructions for Authors is available at [www.anesthesiology.org](http://www.anesthesiology.org). Please refer to the Instructions for the preparation of any material for submission to ANESTHESIOLOGY.

Manuscripts submitted for consideration for publication must be submitted in electronic format. The preferred method is via the Journal's Web site (<http://www.anesthesiology.org>). Detailed directions for submissions and the most recent version of the Instructions for Authors can be found on the Web site (<http://www.anesthesiology.org>). Books and educational materials should be sent to Alan Jay Schwartz, M.D., M.S.Ed., Director of Education, Department of Anesthesiology and Critical Care Medicine, The

Children's Hospital of Philadelphia, 34th Street and Civic Center Blvd., Room 9327, Philadelphia, Pennsylvania 19104-4399. Article-specific permission requests are managed with Copyright Clearance Center's Rightslink service. Information can be accessed directly from articles on the journal Web site. More information is available at <http://anesthesiology.pubs.asahq.org/public/rightsandpermissions.aspx>. For questions about the Rightslink service, e-mail [customer care@copyright.com](mailto:customer care@copyright.com) or call 877-622-5543 (U.S. only) or 978-777-9929. Advertising and related correspondence should be addressed to Advertising Manager, ANESTHESIOLOGY, Wolters Kluwer Health, Inc., Two Commerce Square, 2001 Market Street, Philadelphia, Pennsylvania 19103 (Web site: <http://www.wkcenter.com/>). Publication of an advertisement in ANESTHESIOLOGY does not constitute endorsement by the Society or Wolters Kluwer Health, Inc. of the product or service described therein or of any representations made by the advertiser with respect to the product or service.

**ANESTHESIOLOGY** (ISSN 0003-3022) is published monthly by Wolters Kluwer Health, Inc., 14700 Citicorp Drive, Bldg 3, Hagerstown, MD 21742. Business office: Two Commerce Square, 2001 Market Street, Philadelphia, PA 19103. Periodicals postage paid at Hagerstown, MD, and at additional mailing offices. Copyright © 2019, the American Society of Anesthesiologists, Inc. All Rights Reserved.

**Annual Subscription Rates:** *United States*—\$977 Individual, \$2249 Institution, \$393 In-training. *Rest of World*—\$1030 Individual, \$2497 Institution, \$393 In-training. Single copy rate \$230. Subscriptions outside of North America must add \$56 for airfreight delivery. Add state sales tax, where applicable. The GST tax of 7% must be added to all orders shipped to Canada (Wolters Kluwer Health, Inc.'s GST Identification #895524239, Publications Mail Agreement #1119672). Indicate in-training status and name of institution. Institution rates apply to libraries, hospitals, corporations, and partnerships of three or more individuals. Subscription prices outside the United States must be prepaid. Prices subject to change without notice. Subscriptions will begin with currently available issue unless otherwise requested. Visit us online at [www.lww.com](http://www.lww.com).

Individual and in-training subscription rates include print and access to the online version. Online-only subscriptions for individuals (\$323) and persons in training (\$323) are available to nonmembers and may be ordered by downloading a copy of the Online Subscription FAXback Form from the Web site, completing the information requested, and faxing the completed form to 301-223-2400. Institutional rates are for print only; online subscriptions are available via Ovid. Institutions can choose to purchase a print and online subscription together for a discounted rate. Institutions that wish to purchase a print subscription, please contact Wolters Kluwer Health, Inc., 14700 Citicorp Drive, Bldg 3, Hagerstown, MD 21742; phone: 800-638-3030; fax: 301-223-2400. Institutions

that wish to purchase an online subscription or online with print, please contact the Ovid Regional Sales Office near you or visit [www.ovid.com/site/index.jsp](http://www.ovid.com/site/index.jsp) and select Contact and Locations.

**Address for non-member subscription information, orders, or change of address** (except Japan): Wolters Kluwer Health, Inc., 14700 Citicorp Drive, Bldg 3, Hagerstown, MD 21742; phone: 800-638-3030; fax: 301-223-2400. In Japan, contact Wolters Kluwer Health Japan Co., Ltd., Forecast Mita Building 5th floor, 1-3-31 Mita Minato-ku, Tokyo, Japan 108-0073; phone: +81 3 5427 1969; e-mail: [journal@wkjapan.co.jp](mailto:journal@wkjapan.co.jp).

**Address for member subscription information, orders, or change of address:** Members of the American Society of Anesthesiologists receive the print and online journal with their membership. To become a member or provide a change of address, please contact the American Society of Anesthesiologists, 1061 American Lane, Schaumburg, Illinois 60173-4973; phone: 847-825-5586; fax: 847-825-1692; e-mail: [membership@ASAhq.org](mailto:membership@ASAhq.org). For all other membership inquiries, contact Wolters Kluwer Health, Inc., Customer Service Department, P.O. Box 1610, Hagerstown, MD 21740; phone: 800-638-3030; fax: 301-223-2400.

**Postmaster:** Send address changes to ANESTHESIOLOGY, P.O. BOX 1610, Hagerstown, MD 21740.

**Advertising:** Please contact Hilary Druker, Advertising Field Sales Representative, Health Learning, Research & Practice, Medical Journals, Wolters Kluwer Health, Inc.; phone: 609-304-9187; e-mail: [Hilary.Druker@wolterskluwer.com](mailto:Hilary.Druker@wolterskluwer.com). For classified advertising: Dave Wiegand, Recruitment Advertising Representative, Wolters Kluwer Health, Inc., Two Commerce Square, 2001 Market Street, Philadelphia, PA 19103; phone: 847-361-6128; e-mail: [Dave.Wiegand@wolterskluwer.com](mailto:Dave.Wiegand@wolterskluwer.com).
